# Supplementary material for: Polarity-extended 8 − Neff rule for semiconducting main-group compounds with the TiNiSi-type of crystal structure
Source: Royal Society of Chemistry journal article supplement (doi:10.1039/d3dt00621b), 2023-01-01
Supplement: d3dt00621b1.pdf [file d3dt00621b1.pdf]

## Supporting Information

### Polarity-extended $8-N^{\text{eff}}$ rule for semiconducting main-group compounds with the TiNiSi type of crystal structure

Riccardo Freccero,<sup>\*[a,b]</sup> Yuri Grin,<sup>[a]</sup> and Frank R. Wagner <sup>\*[a]</sup>

<sup>[a]</sup> Max Planck Institute for Chemical Physics of Solids, Noethnitzer Str. 40, 01187 Dresden, Germany; email: frank.wagner@cpfs.mpg.de

<sup>[b]</sup> Dipartimento di Chimica e Chimica Industriale, Università degli Studi di Genova, I-16146 Genova, Italy; email: riccardo.freccero@unige.it

**Table S1.** Lattice parameters, cell volume per formula unit (*f.u.*) and calculated band gaps for *AA'E* compounds studied.

| Compound<br><i>AA'E</i>           | Experimental                  |                                                         |  | Relaxed               |                                                         |  | Band<br>gap<br>(eV) |
|-----------------------------------|-------------------------------|---------------------------------------------------------|--|-----------------------|---------------------------------------------------------|--|---------------------|
|                                   | <i>a, b, c</i><br>(Å)         | <i>V</i><br>(Å <sup>3</sup> <i>f.u.</i> <sup>-1</sup> ) |  | <i>a, b, c</i><br>(Å) | <i>V</i><br>(Å <sup>3</sup> <i>f.u.</i> <sup>-1</sup> ) |  |                     |
| Be <sub>2</sub> C † <sup>1</sup>  | 4.340(2)                      | 20.44                                                   |  | 4.341                 | 20.45                                                   |  | 1.16                |
| Mg <sub>2</sub> C † <sup>2</sup>  | 5.4480(4)                     | 40.42                                                   |  | 5.460                 | 40.69                                                   |  | 0.74                |
| Mg <sub>2</sub> Sn † <sup>3</sup> | 6.76648(2)                    | 77.45                                                   |  | 6.816                 | 79.16                                                   |  | 0.00                |
| Ba <sub>2</sub> Ge †              | <i>hypothetic</i>             |                                                         |  | 8.006                 | 128.29                                                  |  | 0.04                |
| Ca <sub>2</sub> Si † <sup>4</sup> | 7.6910(3) 4.8174(1) 9.0477(3) | 83.81                                                   |  | 7.614 4.821 9.038     | 82.94                                                   |  | 0.29                |
| Ca <sub>2</sub> Ge † <sup>5</sup> | 7.734(7) 4.834(4) 9.069(9)    | 84.76                                                   |  | 7.675 4.857 9.090     | 84.71                                                   |  | 0.31                |
| Sr <sub>2</sub> Si † <sup>6</sup> | 8.11(2) 5.15(2) 9.54(2)       | 99.61                                                   |  | 8.120 5.143 9.595     | 100.17                                                  |  | 0.36                |
| Sr <sub>2</sub> Ge † <sup>7</sup> | 8.13(2) 5.20(6) 9.58(2)       | 101.25                                                  |  | 8.178 5.188 9.653     | 102.39                                                  |  | 0.39                |
| Ba <sub>2</sub> Si † <sup>8</sup> | 8.43(2) 5.40(2) 9.88(2)       | 112.44                                                  |  | 8.448 5.375 10.096    | 114.61                                                  |  | 0.07                |
| Ba <sub>2</sub> Ge † <sup>9</sup> | 8.38(2) 5.48(2) 10.04(2)      | 115.26                                                  |  | 8.487 5.433 10.169    | 117.22                                                  |  | 0.05                |
| Ba <sub>2</sub> Pb <sup>10</sup>  | 8.651(1) 5.691(2) 10.618(2)   | 130.69                                                  |  | 8.768 5.763 10.759    | 135.91                                                  |  | 0.05                |
| CaMgSi † <sup>11</sup>            | 7.4825(3) 4.4319(2) 8.3133(3) | 68.92                                                   |  | 7.474 4.433 8.318     | 68.90                                                   |  | 0.04                |
| CaMgGe † <sup>12</sup>            | 7.62(2) 4.42(2) 8.34(2)       | 70.22                                                   |  | 7.529 4.464 8.418     | 70.73                                                   |  | 0.00                |
| CaMgSn † <sup>12</sup>            | 7.86(2) 4.66(2) 8.74(2)       | 80.03                                                   |  | 7.875 4.720 8.818     | 81.94                                                   |  | 0.02                |
| SrMgGe <sup>12</sup>              | 7.80(2) 4.56(2) 8.55(2)       | 76.03                                                   |  | 7.874 4.631 8.635     | 78.72                                                   |  | 0.12                |
| CaLiAs † <sup>13</sup>            | 7.233(3) 4.313(1) 7.895(3)    | 61.57                                                   |  | 7.253 4.311 7.976     | 62.35                                                   |  | 1.19                |
| CaLiSb <sup>13</sup>              | 7.643(1) 4.632(1) 8.292(1)    | 73.39                                                   |  | 7.663 4.639 8.336     | 74.08                                                   |  | 0.65                |
| CaLiBi † <sup>13</sup>            | 7.7294(9) 4.7134(6) 8.422(1)  | 76.71                                                   |  | 7.813 4.735 8.530     | 78.89                                                   |  | 0.55                |
| SrLiAs † <sup>14</sup>            | 7.6458(2) 4.5158(1) 8.0403(3) | 69.40                                                   |  | 7.647 4.519 8.152     | 70.43                                                   |  | 1.13                |
| NaLiSe † <sup>15</sup>            | 7.174(4) 4.249(2) 7.716(2)    | 58.80                                                   |  | 7.206 4.270 7.779     | 59.84                                                   |  | 2.44                |
| NaLiTe † <sup>16</sup>            | 7.740(1) 4.624(2) 8.406(1)    | 75.21                                                   |  | 7.720 4.598 8.358     | 74.17                                                   |  | 2.30                |
| KNaSe † <sup>16</sup>             | 8.063(2) 4.817(1) 8.651(2)    | 84.00                                                   |  | 8.149 4.833 8.798     | 86.62                                                   |  | 2.01                |

† TiNiSi structure type; ‡ CaF<sub>2</sub> structure type;

**Table S2.** Atomic (according to the periodic table of the elements PTE) and ELI-D core populations  $N_{core}^{PTE}(X)$  and  $N_{core}^{ELI}(X)$ , respectively, for each atomic species in  $A^1A'^1E^{14}$  compounds, and the corresponding the valence shell defects  $N_{vdef}^{ELI}(X)$ .

| Compound | Species $X$ | $N_{core}^{PTE}(X)$ | $N_{core}^{ELI}(X)$ | $N_{vdef}^{ELI}(X)$ |
|----------|-------------|---------------------|---------------------|---------------------|
| CaMgSi † | Ca          | 18                  | 18.29               | -0.29               |
|          | Mg          | 10                  | 10.07               | -0.07               |
|          | Si          | 10                  | 10.07               | -0.07               |
| CaMgGe † | Ca          | 18                  | 18.29               | -0.29               |
|          | Mg          | 10                  | 10.07               | -0.07               |
|          | Ge          | 28                  | 27.72               | +0.28               |
| CaMgSn † | Ca          | 18                  | 18.29               | -0.29               |
|          | Mg          | 10                  | 10.06               | -0.06               |
|          | Sn          | 46                  | 45.77               | +0.23               |
| SrMgGe † | Sr          | 36                  | 36.30               | -0.30               |
|          | Mg          | 10                  | 10.07               | -0.07               |
|          | Ge          | 28                  | 27.73               | +0.27               |

† TiNiSi-type (optimized)

**Table S3** Atomic (according to the periodic table of the elements PTE) and ELI-D core populations  $N_{core}^{PTE}(X)$  and  $N_{core}^{ELI}(X)$ , respectively, for each atomic species in  $A^2A'1E^{15}$  compounds, and the corresponding valence shell defects  $N_{vdef}^{ELI}(X)$ .

| Compound | Species $X$ | $N_{core}^{PTE}(X)$ | $N_{core}^{ELI}(X)$ | $N_{vdef}^{ELI}(X)$ |
|----------|-------------|---------------------|---------------------|---------------------|
| CaLiAs † | Ca          | 18                  | 18.29               | -0.29               |
|          | Li          | 2                   | 2.04                | -0.04               |
|          | As          | 28                  | 27.76               | +0.24               |
| CaLiSb † | Ca          | 18                  | 18.28               | -0.28               |
|          | Li          | 2                   | 2.04                | -0.04               |
|          | Sb          | 46                  | 45.76               | +0.24               |
| CaLiBi † | Ca          | 18                  | 18.29               | -0.29               |
|          | Li          | 2                   | 2.04                | -0.04               |
|          | Bi          | 78                  | 77.65               | +0.35               |
| SrLiAs † | Sr          | 36                  | 36.29               | -0.29               |
|          | Li          | 2                   | 2.04                | -0.04               |
|          | As          | 28                  | 27.76               | +0.24               |

† TiNiSi-type (optimized)

**Table S4.** Atomic (according to the periodic table of the elements PTE) and ELI-D core populations  $N_{core}^{PTE}(X)$  and  $N_{core}^{ELI}(X)$ , respectively, for each atomic species in  $A^2A'E^{16}$  compounds, and the corresponding valence shell defects  $N_{vdef}^{ELI}(X)$ .

| Compound | Species $X$ | $N_{core}^{PTE}(X)$ | $N_{core}^{ELI}(X)$ | $N_{vdef}^{ELI}(X)$ |
|----------|-------------|---------------------|---------------------|---------------------|
| NaLiSe † | Na          | 10                  | 10.04               | -0.04               |
|          | Li          | 2                   | 2.04                | -0.04               |
|          | Se          | 28                  | 27.78               | +0.22               |
| NaLiTe † | Na          | 10                  | 10.05               | -0.05               |
|          | Li          | 2                   | 2.04                | -0.04               |
|          | Te          | 46                  | 45.74               | +0.26               |
| KNaSe †  | K           | 18                  | 18.10               | -0.10               |
|          | Na          | 10                  | 10.05               | -0.05               |
|          | Se          | 28                  | 27.78               | +0.22               |

† TiNiSi-type (optimized)

**Table S5.** Atomic (according to the periodic table of the elements PTE) and ELI-D core populations  $N_{core}^{PTE}(X)$  and  $N_{core}^{ELI}(X)$ , respectively, for each atomic species in  $A_2E^{14}$  compounds, and the corresponding valence shell defects  $N_{vdef}^{ELI}(X)$ .

| Compound             | Species $X$ | $N_{core}^{PTE}(X)$ | $N_{core}^{ELI}(X)$ | $N_{vdef}^{ELI}(X)$ |
|----------------------|-------------|---------------------|---------------------|---------------------|
| Ca <sub>2</sub> Si † | Ca1         | 18                  | 18.29               | -0.29               |
|                      | Ca2         | 18                  | 18.27               | -0.27               |
|                      | Si          | 10                  | 10.07               | -0.07               |
| Ca <sub>2</sub> Ge † | Ca1         | 18                  | 18.30               | -0.30               |
|                      | Ca2         | 18                  | 18.28               | -0.28               |
|                      | Ge          | 28                  | 27.73               | +0.27               |
| Sr <sub>2</sub> Si † | Sr1         | 36                  | 36.31               | -0.31               |
|                      | Sr2         | 36                  | 36.29               | -0.29               |
|                      | Si          | 10                  | 10.07               | -0.07               |
| Sr <sub>2</sub> Ge † | Sr1         | 36                  | 36.31               | -0.31               |
|                      | Sr2         | 36                  | 36.29               | -0.29               |
|                      | Ge          | 28                  | 27.73               | +0.27               |
| Ba <sub>2</sub> Si † | Ba1         | 54                  | 54.50               | -0.50               |
|                      | Ba2         | 54                  | 54.46               | -0.46               |
|                      | Si          | 10                  | 10.07               | -0.07               |
| Ba <sub>2</sub> Ge † | Ba1         | 54                  | 54.50               | -0.50               |
|                      | Ba2         | 54                  | 54.46               | -0.46               |
|                      | Ge          | 28                  | 27.74               | +0.26               |
| Ba <sub>2</sub> Pb † | Ba1         | 54                  | 54.47               | -0.47               |
|                      | Ba2         | 54                  | 54.43               | -0.43               |
|                      | Pb          | 78                  | 77.79               | +0.21               |

† TiNiSi-type (optimized)

**Table S6.** ELI-D core population for each atomic species in  $A_2E^{14}$  compounds with the  $cF12$ -CaF<sub>2</sub> structure, together with the valence shell defects.

| Compound                          | Species $X$ | $N_{core}^{PTE}(X)$ | $N_{core}^{ELI}(X)$ | $N_{vdef}^{ELI}(X)$ |
|-----------------------------------|-------------|---------------------|---------------------|---------------------|
| Be <sub>2</sub> C ††              | Be          | 2                   | 2.06                | -0.06               |
|                                   | C           | 2                   | 2.11                | -0.11               |
| Mg <sub>2</sub> C ††              | Mg          | 10                  | 10.07               | -0.07               |
|                                   | C           | 2                   | 2.10                | -0.10               |
| Mg <sub>2</sub> Sn ††             | Mg          | 10                  | 10.07               | -0.07               |
|                                   | Sn          | 46                  | 45.76               | +0.24               |
| <i>hyp</i> -Ba <sub>2</sub> Ge †† | Ba          | 54                  | 54.45               | -0.45               |
|                                   | Ge          | 28                  | 27.73               | +0.27               |

†† anti-CaF<sub>2</sub>-type type (optimized)

**Table S7.** Position-space bonding results for each constituting atoms of the targeted compounds **without** the application of the **PSC0 correction**. QTAIM effective charges and volumes, which are not affected by this correction, are listed in the main text.

| Compound                          | ELIBON |       |       | $N_{acc}^{ELI}(C^E)$ | $N_{val}^{ELI}(E)$ | $N_{cb}(E)$ | $N_{lp}(E)$ |
|-----------------------------------|--------|-------|-------|----------------------|--------------------|-------------|-------------|
|                                   | $A$    | $A'$  | $E$   |                      |                    |             |             |
| NaLiSe †                          | +0.95  | +0.96 | -1.91 | 8.13                 | 7.88               | 0.25        | 3.82        |
| NaLiTe †                          | +0.95  | +0.96 | -1.91 | 8.17                 | 7.92               | 0.25        | 3.84        |
| KNaSe †                           | +0.90  | +0.95 | -1.85 | 8.07                 | 7.76               | 0.31        | 3.72        |
| CaLiAs †                          | +1.71  | +0.96 | -2.67 | 7.92                 | 7.39               | 0.53        | 3.43        |
| CaLiSb †                          | +1.72  | +0.96 | -2.67 | 7.91                 | 7.38               | 0.54        | 3.42        |
| CaLiBi †                          | +1.71  | +0.96 | -2.67 | 8.03                 | 7.48               | 0.56        | 3.46        |
| SrLiAs †                          | +1.71  | +0.96 | -2.67 | 7.91                 | 7.35               | 0.55        | 3.40        |
| CaMgSi †                          | +1.71  | +1.93 | -3.64 | 7.57                 | 6.58               | 0.99        | 2.79        |
| CaMgGe †                          | +1.71  | +1.93 | -3.64 | 7.91                 | 6.88               | 1.03        | 2.92        |
| CaMgSn †                          | +1.71  | +1.93 | -3.64 | 7.88                 | 6.80               | 1.08        | 2.86        |
| SrMgGe †                          | +1.70  | +1.93 | -3.63 | 7.90                 | 6.77               | 1.13        | 2.82        |
| Ca <sub>2</sub> Si †              | +1.73  | +1.71 | -3.44 | 7.36                 | 6.36               | 1.00        | 2.68        |
| Ca <sub>2</sub> Ge †              | +1.73  | +1.70 | -3.43 | 7.71                 | 6.69               | 1.02        | 2.84        |
| Sr <sub>2</sub> Si †              | +1.71  | +1.69 | -3.40 | 7.34                 | 6.25               | 1.09        | 2.58        |
| Sr <sub>2</sub> Ge †              | +1.71  | +1.69 | -3.40 | 7.68                 | 6.56               | 1.12        | 2.72        |
| Ba <sub>2</sub> Si †              | +1.55  | +1.50 | -3.05 | 6.98                 | 5.89               | 1.10        | 2.39        |
| Ba <sub>2</sub> Ge †              | +1.55  | +1.50 | -3.05 | 7.31                 | 6.19               | 1.12        | 2.54        |
| Ba <sub>2</sub> Pb †              | +1.57  | +1.53 | -3.10 | 7.32                 | 6.13               | 1.19        | 2.47        |
| Be <sub>2</sub> C ††              | +1.94  | –     | -3.88 | 7.77                 | 7.14               | 0.63        | 3.26        |
| Mg <sub>2</sub> C ††              | +1.93  | –     | -3.87 | 7.77                 | 6.96               | 0.81        | 3.07        |
| Mg <sub>2</sub> Sn ††             | +1.93  | –     | -3.87 | 8.11                 | 7.00               | 1.11        | 2.95        |
| <i>hyp</i> -Ba <sub>2</sub> Ge †† | +1.55  | –     | -3.09 | 7.36                 | 6.28               | 1.07        | 2.60        |

† TiNiSi-type (optimized), †† anti-CaF<sub>2</sub>-type (optimized)

**Table S8a.** Data referred to ELI-D valence basins for ternary phases **after PSC0**.

| <i>Compound</i> | <i>ELI-D basin (B<sub>i</sub>)</i> | <i>Atomicity</i> | <i>N(B<sub>i</sub>)</i> | <i>p(B<sub>i</sub><sup>E</sup>)</i> | <i>cc</i> | <i>lpc</i> | <i>p(B<sub>i</sub><sup>A'</sup>)</i> | $\sum_j p(B_i^{A_j})$ |
|-----------------|------------------------------------|------------------|-------------------------|-------------------------------------|-----------|------------|--------------------------------------|-----------------------|
| NaLiSe †        | <i>d1</i>                          | (Se; Li; 4Na)    | 2.0796                  | 0.9590                              | 0.0820    | 0.9180     | 0.0171                               | 0.0237                |
|                 | <i>d2</i>                          | (Se; Li; 4Na)    | 2.1547                  | 0.9565                              | 0.0871    | 0.9129     | 0.0180                               | 0.0250                |
|                 | <i>d2</i>                          | (Se; Li; 4Na)    | 2.1753                  | 0.9565                              | 0.0870    | 0.9130     | 0.0180                               | 0.0250                |
|                 | <i>d3</i>                          | (Se; Li; 3Na)    | 1.5932                  | 0.9585                              | 0.0831    | 0.9169     | 0.0227                               | 0.0185                |
| NaLiTe †        | <i>d1</i>                          | (Te; Li; 4Na)    | 2.0301                  | 0.9598                              | 0.0803    | 0.9197     | 0.0179                               | 0.0221                |
|                 | <i>d2</i>                          | (Te; Li; 4Na)    | 2.1225                  | 0.9576                              | 0.0849    | 0.9151     | 0.0179                               | 0.0239                |
|                 | <i>d2</i>                          | (Te; Li; 4Na)    | 2.1394                  | 0.9575                              | 0.0850    | 0.9150     | 0.0180                               | 0.0239                |
|                 | <i>d3</i>                          | (Te; Li; 3Na)    | 1.7093                  | 0.9563                              | 0.0873    | 0.9127     | 0.0207                               | 0.0224                |
| KNaSe †         | <i>d1</i>                          | (Se; Na; 4K)     | 1.9536                  | 0.9407                              | 0.1186    | 0.8814     | 0.0265                               | 0.0324                |
|                 | <i>d2</i>                          | (Se; Na; 4K)     | 2.1996                  | 0.9406                              | 0.1189    | 0.8811     | 0.0247                               | 0.0346                |
|                 | <i>d2</i>                          | (Se; Na; 4K)     | 2.2177                  | 0.9406                              | 0.1188    | 0.8812     | 0.0246                               | 0.0347                |
|                 | <i>d3</i>                          | (Se; Na; 3K)     | 1.6327                  | 0.9452                              | 0.1096    | 0.8904     | 0.0320                               | 0.0225                |
| CaLiAs †        | <i>d1</i>                          | (As; Li; 4Ca)    | 2.0596                  | 0.8881                              | 0.2238    | 0.7762     | 0.0200                               | 0.0916                |
|                 | <i>d2</i>                          | (As; Li; 4Ca)    | 2.4396                  | 0.8907                              | 0.2187    | 0.7813     | 0.0193                               | 0.0892                |
|                 | <i>d2</i>                          | (As; Li; 4Ca)    | 2.4591                  | 0.8915                              | 0.2171    | 0.7829     | 0.0193                               | 0.0884                |
|                 | <i>d3</i>                          | (As; Li; 3Ca)    | 1.0462                  | 0.9101                              | 0.1797    | 0.8203     | 0.0368                               | 0.0512                |
| CaLiSb †        | <i>d1</i>                          | (Sb; Li; 4Ca)    | 2.3102                  | 0.8884                              | 0.2232    | 0.7768     | 0.0190                               | 0.0925                |
|                 | <i>d2</i>                          | (Sb; Li; 4Ca)    | 2.2158                  | 0.8894                              | 0.2211    | 0.7789     | 0.0216                               | 0.0880                |
|                 | <i>d2</i>                          | (Sb; Li; 4Ca)    | 2.2002                  | 0.8906                              | 0.2189    | 0.7811     | 0.0214                               | 0.0870                |
|                 | <i>d3</i>                          | (Sb; Li; 3Ca)    | 1.2769                  | 0.9071                              | 0.1859    | 0.8141     | 0.0292                               | 0.0618                |
| CaLiBi †        | <i>d1</i>                          | (Bi; Li; 4Ca)    | 2.2376                  | 0.8854                              | 0.2293    | 0.7707     | 0.0198                               | 0.0946                |
|                 | <i>d2</i>                          | (Bi; Li; 4Ca)    | 2.5708                  | 0.8869                              | 0.2262    | 0.7738     | 0.0185                               | 0.0930                |
|                 | <i>d2</i>                          | (Bi; Li; 4Ca)    | 2.5899                  | 0.8866                              | 0.2269    | 0.7731     | 0.0186                               | 0.0932                |
|                 | <i>d3</i>                          | (Bi; Li; 3Ca)    | 0.6083                  | 0.9287                              | 0.1426    | 0.8574     | 0.0591                               | 0.0082                |
| SrLiAs †        | <i>d1</i>                          | (As; Li; 4Sr)    | 1.6570                  | 0.8893                              | 0.2213    | 0.7787     | 0.0240                               | 0.0860                |
|                 | <i>d2</i>                          | (As; Li; 4Sr)    | 2.4868                  | 0.8851                              | 0.2299    | 0.7701     | 0.0195                               | 0.0951                |
|                 | <i>d2</i>                          | (As; Li; 4Sr)    | 2.5086                  | 0.8852                              | 0.2296    | 0.7704     | 0.0195                               | 0.0950                |
|                 | <i>d3</i>                          | (As; Li; 3Sr)    | 1.3521                  | 0.9035                              | 0.1929    | 0.8071     | 0.0263                               | 0.0688                |
| CaMgSi †        | <i>d1</i>                          | (Si; Mg; 4Ca)    | 1.9743                  | 0.8290                              | 0.3419    | 0.6581     | 0.0786                               | 0.0920                |
|                 | <i>d2</i>                          | (Si; Mg; 4Ca)    | 2.3221                  | 0.8320                              | 0.3360    | 0.6640     | 0.0703                               | 0.0970                |
|                 | <i>d2</i>                          | (Si; Mg; 4Ca)    | 2.3411                  | 0.8311                              | 0.3378    | 0.6622     | 0.0708                               | 0.0974                |
|                 | <i>d3</i>                          | (Si; Mg; 3Ca)    | 1.3632                  | 0.8310                              | 0.3380    | 0.6620     | 0.1052                               | 0.0613                |
| CaMgGe †        | <i>d1</i>                          | (Ge; Mg; 4Ca)    | 2.0017                  | 0.8245                              | 0.3511    | 0.6489     | 0.0819                               | 0.0933                |
|                 | <i>d2</i>                          | (Ge; Mg; 4Ca)    | 2.3121                  | 0.8285                              | 0.3431    | 0.6569     | 0.0745                               | 0.0964                |
|                 | <i>d2</i>                          | (Ge; Mg; 4Ca)    | 2.3324                  | 0.8269                              | 0.3462    | 0.6538     | 0.0750                               | 0.0975                |
|                 | <i>d3</i>                          | (Ge; Mg; 3Ca)    | 1.3579                  | 0.8180                              | 0.3640    | 0.6360     | 0.1156                               | 0.0620                |
| CaMgSn †        | <i>d1</i>                          | (Sn; Mg; 4Ca)    | 2.1293                  | 0.8204                              | 0.3592    | 0.6408     | 0.0846                               | 0.0945                |
|                 | <i>d2</i>                          | (Sn; Mg; 4Ca)    | 2.2612                  | 0.8239                              | 0.3522    | 0.6478     | 0.0800                               | 0.0952                |
|                 | <i>d2</i>                          | (Sn; Mg; 4Ca)    | 2.2776                  | 0.8234                              | 0.3532    | 0.6468     | 0.0807                               | 0.0951                |
|                 | <i>d3</i>                          | (Sn; Mg; 3Ca)    | 1.3361                  | 0.8102                              | 0.3796    | 0.6204     | 0.1254                               | 0.0606                |
| SrMgGe †        | <i>d1</i>                          | (Ge; Mg; 4Sr)    | 1.7658                  | 0.8081                              | 0.3838    | 0.6162     | 0.0967                               | 0.0950                |
|                 | <i>d2</i>                          | (Ge; Mg; 4Sr)    | 2.3377                  | 0.8121                              | 0.3758    | 0.6242     | 0.0822                               | 0.1053                |
|                 | <i>d2</i>                          | (Ge; Mg; 4Sr)    | 2.3571                  | 0.8108                              | 0.3785    | 0.6215     | 0.0827                               | 0.1061                |
|                 | <i>d3</i>                          | (Ge; Mg; 3Sr)    | 1.5430                  | 0.8179                              | 0.3643    | 0.6357     | 0.1090                               | 0.0708                |

† TiNiSi-type (optimized)

**Table S8b.** Data referred to ELI-D valence basins for binary phases **after PSC0**.

| <i>Compound</i>      | <i>ELI-D basin (<math>B_i</math>)</i> | <i>Atomicity</i> | $N(B_i)$ | $p(B_i^E)$ | <i>cc</i> | <i>lpc</i> | $\sum_l p(B_i^{A1_l})$ | $\sum_j p(B_i^{A2_j})$ |
|----------------------|---------------------------------------|------------------|----------|------------|-----------|------------|------------------------|------------------------|
| Ca <sub>2</sub> Si † | <i>d1*</i>                            | (Si; 3Ca1; 2Ca2) | 1.7458   | 0.7771     | 0.4457    | 0.5543     | 0.1437                 | 0.0746                 |
|                      | <i>d2*</i>                            | (Si; 3Ca1; 3Ca2) | 3.1165   | 0.8114     | 0.3773    | 0.6227     | 0.0880                 | 0.0993                 |
|                      | <i>d2*</i>                            | (Si; 3Ca1; 3Ca2) | 3.1392   | 0.8123     | 0.3753    | 0.6247     | 0.0886                 | 0.0977                 |
| Ca <sub>2</sub> Ge † | <i>d1*</i>                            | (Ge; 3Ca1; 2Ca2) | 1.8002   | 0.7735     | 0.4531    | 0.5469     | 0.1464                 | 0.0753                 |
|                      | <i>d2*</i>                            | (Ge; 3Ca1; 3Ca2) | 3.0879   | 0.8103     | 0.3795    | 0.6205     | 0.0887                 | 0.0995                 |
|                      | <i>d2*</i>                            | (Ge; 3Ca1; 3Ca2) | 3.1184   | 0.8089     | 0.3822    | 0.6178     | 0.0886                 | 0.1010                 |
| Sr <sub>2</sub> Si † | <i>d1*</i>                            | (Si; 3Sr1; 2Sr2) | 1.8470   | 0.7602     | 0.4797    | 0.5203     | 0.1570                 | 0.0812                 |
|                      | <i>d2*</i>                            | (Si; 3Sr1; 3Sr2) | 3.0691   | 0.7976     | 0.4048    | 0.5952     | 0.0931                 | 0.1083                 |
|                      | <i>d2*</i>                            | (Si; 3Sr1; 3Sr2) | 3.0895   | 0.7988     | 0.4024    | 0.5976     | 0.0933                 | 0.1071                 |
| Sr <sub>2</sub> Ge † | <i>d1*</i>                            | (Ge; 3Sr1; 2Sr2) | 1.8413   | 0.7550     | 0.4899    | 0.5101     | 0.1593                 | 0.0839                 |
|                      | <i>d2*</i>                            | (Ge; 3Sr1; 3Sr2) | 3.0632   | 0.7962     | 0.4076    | 0.5924     | 0.0942                 | 0.1087                 |
|                      | <i>d2*</i>                            | (Ge; 3Sr1; 3Sr2) | 3.0920   | 0.7949     | 0.4101    | 0.5899     | 0.0944                 | 0.1098                 |
| Ba <sub>2</sub> Si † | <i>d1*</i>                            | (Si; 3Ba1; 2Ba2) | 1.8456   | 0.7103     | 0.5795    | 0.4205     | 0.1915                 | 0.0982                 |
|                      | <i>d2*</i>                            | (Si; 3Ba1; 2Ba2) | 2.0761   | 0.7562     | 0.4876    | 0.5124     | 0.1313                 | 0.1125                 |
|                      | <i>d2*</i>                            | (Si; 3Ba1; 2Ba2) | 2.0906   | 0.7551     | 0.4898    | 0.5102     | 0.1315                 | 0.1135                 |
|                      | <i>d3*</i>                            | (Si; 4Ba1; 3Ba2) | 1.9920   | 0.7516     | 0.4969    | 0.5031     | 0.0767                 | 0.1704                 |
| Ba <sub>2</sub> Ge † | <i>d1*</i>                            | (Ge; 3Ba1; 2Ba2) | 1.8570   | 0.7048     | 0.5904    | 0.4096     | 0.1930                 | 0.1021                 |
|                      | <i>d2*</i>                            | (Ge; 3Ba1; 2Ba2) | 1.9860   | 0.7498     | 0.5006    | 0.4994     | 0.1340                 | 0.1163                 |
|                      | <i>d2*</i>                            | (Ge; 3Ba1; 2Ba2) | 1.9953   | 0.7506     | 0.4987    | 0.5013     | 0.1339                 | 0.1154                 |
|                      | <i>d3*</i>                            | (Ge; 4Ba1; 3Ba2) | 2.1661   | 0.7526     | 0.4949    | 0.5051     | 0.0803                 | 0.1661                 |
| Ba <sub>2</sub> Pb † | <i>d1*</i>                            | (Pb; 3Ba1; 2Ba2) | 1.8225   | 0.6971     | 0.6058    | 0.3942     | 0.1914                 | 0.1111                 |
|                      | <i>d2*</i>                            | (Pb; 3Ba1; 2Ba2) | 2.0909   | 0.7461     | 0.5078    | 0.4922     | 0.1321                 | 0.1217                 |
|                      | <i>d2*</i>                            | (Pb; 3Ba1; 2Ba2) | 2.0974   | 0.7471     | 0.5058    | 0.4942     | 0.1323                 | 0.1206                 |
|                      | <i>d3*</i>                            | (Pb; 4Ba1; 3Ba2) | 1.9806   | 0.7673     | 0.4655    | 0.5345     | 0.0767                 | 0.1543                 |

† TiNiSi-type (optimized)



**Table S8c.** Data referred to ELI-D valence basins for binary phases with the  $cF12$ -CaF<sub>2</sub> structure after PSC0.

| <i>Compound</i>                   | <i>Atomicity</i> | $\bar{N}(B_i)$ | $p(B_i^E)$ | <i>cc</i> | <i>lpc</i> | $\sum_l p(B_i^{A1l})$ |
|-----------------------------------|------------------|----------------|------------|-----------|------------|-----------------------|
| Be <sub>2</sub> C ††              | (C; Be)          | 1.0005         | 0.9055     | 0.1891    | 0.8109     | 0.0933                |
|                                   | (C; Be)          | 1.0006         | 0.9054     | 0.1893    | 0.8107     | 0.0933                |
|                                   | (C; Be)          | 1.0009         | 0.9061     | 0.1878    | 0.8122     | 0.0934                |
|                                   | (C; Be)          | 1.0008         | 0.9057     | 0.1887    | 0.8113     | 0.0934                |
|                                   | (C; Be)          | 1.0011         | 0.9054     | 0.1892    | 0.8108     | 0.0937                |
|                                   | (C; Be)          | 1.0012         | 0.9062     | 0.1876    | 0.8124     | 0.0938                |
|                                   | (C; Be)          | 1.0018         | 0.9059     | 0.1883    | 0.8117     | 0.0937                |
|                                   | (C; Be)          | 1.0035         | 0.9049     | 0.1901    | 0.8099     | 0.0945                |
| Mg <sub>2</sub> C ††              | (C; Mg)          | 0.9999         | 0.8823     | 0.2355    | 0.7645     | 0.1171                |
|                                   | (C; Mg)          | 0.9999         | 0.8823     | 0.2355    | 0.7645     | 0.1171                |
|                                   | (C; Mg)          | 0.9999         | 0.8822     | 0.2357    | 0.7643     | 0.1172                |
|                                   | (C; Mg)          | 0.9999         | 0.8826     | 0.2349    | 0.7651     | 0.1171                |
|                                   | (C; Mg)          | 1.0000         | 0.8822     | 0.2357    | 0.7643     | 0.1171                |
|                                   | (C; Mg)          | 0.9999         | 0.8826     | 0.2349    | 0.7651     | 0.1172                |
|                                   | (C; Mg)          | 1.0008         | 0.8821     | 0.2359    | 0.7641     | 0.1177                |
|                                   | (C; Mg)          | 1.0008         | 0.8819     | 0.2363    | 0.7637     | 0.1177                |
| Mg <sub>2</sub> Sn ††             | (Sn; Mg)         | 0.9996         | 0.8450     | 0.3101    | 0.6899     | 0.1550                |
|                                   | (Sn; Mg)         | 1.0002         | 0.8449     | 0.3103    | 0.6897     | 0.1551                |
|                                   | (Sn; Mg)         | 0.9999         | 0.8450     | 0.3100    | 0.6900     | 0.1550                |
|                                   | (Sn; Mg)         | 1.0002         | 0.8446     | 0.3107    | 0.6893     | 0.1553                |
|                                   | (Sn; Mg)         | 1.0002         | 0.8448     | 0.3105    | 0.6895     | 0.1551                |
|                                   | (Sn; Mg)         | 1.0001         | 0.8448     | 0.3103    | 0.6897     | 0.1552                |
|                                   | (Sn; Mg)         | 1.0002         | 0.8448     | 0.3105    | 0.6895     | 0.1552                |
|                                   | (Sn; Mg)         | 1.0002         | 0.8448     | 0.3105    | 0.6895     | 0.1552                |
| <i>hyp</i> -Ba <sub>2</sub> Ge †† | (Ge; 4Ba)        | 1.3220         | 0.7509     | 0.4982    | 0.5018     | 0.2491                |
|                                   | (Ge; 4Ba)        | 1.3314         | 0.7526     | 0.4947    | 0.5053     | 0.2473                |
|                                   | (Ge; 4Ba)        | 1.3316         | 0.7525     | 0.4949    | 0.5051     | 0.2474                |
|                                   | (Ge; 4Ba)        | 1.3227         | 0.7506     | 0.4987    | 0.5013     | 0.2494                |
|                                   | (Ge; 4Ba)        | 1.3433         | 0.7538     | 0.4924    | 0.5076     | 0.2461                |
|                                   | (Ge; 4Ba)        | 1.3433         | 0.7538     | 0.4924    | 0.5076     | 0.2461                |

†† anti-CaF<sub>2</sub>-type (optimized)

**Table S9a.** Data referred to ELI-D valence basins for ternary phases **without PSC0**.

| <i>Compound</i> | <i>ELI-D basin (<math>B_i</math>)</i> | <i>Atomicity</i> | $\bar{N}(B_i)$ | $p(B_i^E)$ | <i>cc</i> | <i>lpc</i> | $p(B_i^{A'})$ | $\sum_i^{s_x} p(B_i^A)$ |
|-----------------|---------------------------------------|------------------|----------------|------------|-----------|------------|---------------|-------------------------|
| NaLiSe †        | <i>d1</i>                             | (Se; Li; 4Na)    | 2.1123         | 0.9705     | 0.0591    | 0.9409     | 0.0124        | 0.0171                  |
|                 | <i>d2</i>                             | (Se; Li; 4Na)    | 2.1904         | 0.9684     | 0.0633    | 0.9367     | 0.0130        | 0.0182                  |
|                 | <i>d2</i>                             | (Se; Li; 4Na)    | 2.2105         | 0.9681     | 0.0638    | 0.9362     | 0.0130        | 0.0183                  |
|                 | <i>d3</i>                             | (Se; Li; 3Na)    | 1.6213         | 0.9700     | 0.0600    | 0.9400     | 0.0164        | 0.0133                  |
| NaLiTe †        | <i>d1</i>                             | (Te; Li; 4Na)    | 2.0726         | 0.9708     | 0.0584    | 0.9416     | 0.0130        | 0.0161                  |
|                 | <i>d2</i>                             | (Te; Li; 4Na)    | 2.1682         | 0.9689     | 0.0622    | 0.9378     | 0.0130        | 0.0175                  |
|                 | <i>d2</i>                             | (Te; Li; 4Na)    | 2.1862         | 0.9687     | 0.0626    | 0.9374     | 0.0131        | 0.0176                  |
|                 | <i>d3</i>                             | (Te; Li; 3Na)    | 1.7466         | 0.9683     | 0.0633    | 0.9367     | 0.0150        | 0.0161                  |
| KNaSe †         | <i>d1</i>                             | (Se; Na; 4K)     | 1.9665         | 0.9607     | 0.0785    | 0.9215     | 0.0195        | 0.0196                  |
|                 | <i>d2</i>                             | (Se; Na; 4K)     | 2.2164         | 0.9608     | 0.0785    | 0.9215     | 0.0183        | 0.0208                  |
|                 | <i>d2</i>                             | (Se; Na; 4K)     | 2.2353         | 0.9606     | 0.0788    | 0.9212     | 0.0184        | 0.0209                  |
|                 | <i>d3</i>                             | (Se; Na; 3K)     | 1.6519         | 0.9621     | 0.0758    | 0.9242     | 0.0238        | 0.0137                  |
| CaLiAs †        | <i>d1</i>                             | (As; Li; 4Ca)    | 2.0279         | 0.9314     | 0.1373    | 0.8627     | 0.0155        | 0.0528                  |
|                 | <i>d2</i>                             | (As; Li; 4Ca)    | 2.4101         | 0.9326     | 0.1348    | 0.8652     | 0.0149        | 0.0516                  |
|                 | <i>d2</i>                             | (As; Li; 4Ca)    | 2.4306         | 0.9323     | 0.1354    | 0.8646     | 0.0150        | 0.0519                  |
|                 | <i>d3</i>                             | (As; Li; 3Ca)    | 1.0472         | 0.9405     | 0.1190    | 0.8810     | 0.0277        | 0.0298                  |
| CaLiSb †        | <i>d1</i>                             | (Sb; Li; 4Ca)    | 2.2769         | 0.9304     | 0.1392    | 0.8608     | 0.0149        | 0.0545                  |
|                 | <i>d2</i>                             | (Sb; Li; 4Ca)    | 2.1881         | 0.9305     | 0.1390    | 0.8610     | 0.0168        | 0.0516                  |
|                 | <i>d2</i>                             | (Sb; Li; 4Ca)    | 2.1741         | 0.9309     | 0.1383    | 0.8617     | 0.0167        | 0.0514                  |
|                 | <i>d3</i>                             | (Sb; Li; 3Ca)    | 1.2754         | 0.9394     | 0.1212    | 0.8788     | 0.0224        | 0.0362                  |
| CaLiBi †        | <i>d1</i>                             | (Bi; Li; 4Ca)    | 2.2361         | 0.9288     | 0.1425    | 0.8575     | 0.0154        | 0.0556                  |
|                 | <i>d2</i>                             | (Bi; Li; 4Ca)    | 2.5757         | 0.9295     | 0.1410    | 0.8590     | 0.0143        | 0.0547                  |
|                 | <i>d2</i>                             | (Bi; Li; 4Ca)    | 2.5951         | 0.9292     | 0.1416    | 0.8584     | 0.0144        | 0.0549                  |
|                 | <i>d3</i>                             | (Bi; Li; 3Ca)    | 0.6276         | 0.9463     | 0.1074    | 0.8926     | 0.0438        | 0.0061                  |
| SrLiAs †        | <i>d1</i>                             | (As; Li; 4Sr)    | 1.6349         | 0.9294     | 0.1413    | 0.8587     | 0.0187        | 0.0511                  |
|                 | <i>d2</i>                             | (As; Li; 4Sr)    | 2.4515         | 0.9281     | 0.1438    | 0.8562     | 0.0152        | 0.0565                  |
|                 | <i>d2</i>                             | (As; Li; 4Sr)    | 2.4728         | 0.9277     | 0.1445    | 0.8555     | 0.0153        | 0.0567                  |
|                 | <i>d3</i>                             | (As; Li; 3Sr)    | 1.3480         | 0.9374     | 0.1251    | 0.8749     | 0.0200        | 0.0412                  |
| CaMgSi †        | <i>d1</i>                             | (Si; Mg; 4Ca)    | 1.8639         | 0.8689     | 0.2621    | 0.7379     | 0.0743        | 0.0564                  |
|                 | <i>d2</i>                             | (Si; Mg; 4Ca)    | 2.1925         | 0.8716     | 0.2569    | 0.7431     | 0.0661        | 0.0617                  |
|                 | <i>d2</i>                             | (Si; Mg; 4Ca)    | 2.2100         | 0.8707     | 0.2586    | 0.7414     | 0.0666        | 0.0620                  |
|                 | <i>d3</i>                             | (Si; Mg; 3Ca)    | 1.3002         | 0.8618     | 0.2764    | 0.7236     | 0.0973        | 0.0382                  |
| CaMgGe †        | <i>d1</i>                             | (Ge; Mg; 4Ca)    | 1.9728         | 0.8706     | 0.2587    | 0.7413     | 0.0744        | 0.0546                  |
|                 | <i>d2</i>                             | (Ge; Mg; 4Ca)    | 2.2850         | 0.8736     | 0.2529    | 0.7471     | 0.0671        | 0.0588                  |
|                 | <i>d2</i>                             | (Ge; Mg; 4Ca)    | 2.3037         | 0.8727     | 0.2546    | 0.7454     | 0.0676        | 0.0591                  |
|                 | <i>d3</i>                             | (Ge; Mg; 3Ca)    | 1.3524         | 0.8556     | 0.2888    | 0.7112     | 0.1030        | 0.0370                  |
| CaMgSn †        | <i>d1</i>                             | (Sn; Mg; 4Ca)    | 2.0901         | 0.8645     | 0.2711    | 0.7289     | 0.0786        | 0.0564                  |
|                 | <i>d2</i>                             | (Sn; Mg; 4Ca)    | 2.2244         | 0.8669     | 0.2662    | 0.7338     | 0.0738        | 0.0585                  |
|                 | <i>d2</i>                             | (Sn; Mg; 4Ca)    | 2.2417         | 0.8659     | 0.2682    | 0.7318     | 0.0744        | 0.0589                  |
|                 | <i>d3</i>                             | (Sn; Mg; 3Ca)    | 1.3256         | 0.8449     | 0.3102    | 0.6898     | 0.1147        | 0.0365                  |
| SrMgGe †        | <i>d1</i>                             | (Ge; Mg; 4Sr)    | 1.7403         | 0.8531     | 0.2939    | 0.7061     | 0.0892        | 0.0576                  |
|                 | <i>d2</i>                             | (Ge; Mg; 4Sr)    | 2.3030         | 0.8589     | 0.2821    | 0.7179     | 0.0751        | 0.0656                  |
|                 | <i>d2</i>                             | (Ge; Mg; 4Sr)    | 2.3211         | 0.8580     | 0.2840    | 0.7160     | 0.0757        | 0.0658                  |
|                 | <i>d3</i>                             | (Ge; Mg; 3Sr)    | 1.5366         | 0.8557     | 0.2887    | 0.7113     | 0.0979        | 0.0442                  |

† TiNiSi-type (optimized)

**Table S9b.** Data referred to ELI-D valence basins for binary phases **without PSC0**.

| Compound             | ELI-D basin ( $B_i$ ) | Atomicity        | $N(B_i)$ | $p(B_i^E)$ | $cc$   | $lpc$  | $\sum_l p(B_i^{A1_l})$ | $\sum_j p(B_i^{A2_j})$ |
|----------------------|-----------------------|------------------|----------|------------|--------|--------|------------------------|------------------------|
| Ca <sub>2</sub> Si † | $d1^*$                | (Si; 3Ca1; 2Ca2) | 1.6017   | 0.8383     | 0.3234 | 0.6766 | 0.1047                 | 0.0521                 |
|                      | $d2^*$                | (Si; 3Ca1; 3Ca2) | 2.8690   | 0.8716     | 0.2569 | 0.7431 | 0.0592                 | 0.0677                 |
|                      | $d2^*$                | (Si; 3Ca1; 3Ca2) | 2.8937   | 0.8714     | 0.2573 | 0.7427 | 0.0595                 | 0.0676                 |
| Ca <sub>2</sub> Ge † | $d1^*$                | (Ge; 3Ca1; 2Ca2) | 1.7204   | 0.8418     | 0.3163 | 0.6837 | 0.1024                 | 0.0507                 |
|                      | $d2^*$                | (Ge; 3Ca1; 3Ca2) | 2.9807   | 0.8755     | 0.2490 | 0.7510 | 0.0570                 | 0.0660                 |
|                      | $d2^*$                | (Ge; 3Ca1; 3Ca2) | 3.0059   | 0.8754     | 0.2493 | 0.7507 | 0.0571                 | 0.0660                 |
| Sr <sub>2</sub> Si † | $d1^*$                | (Si; 3Sr1; 2Sr2) | 1.6841   | 0.8247     | 0.3507 | 0.6493 | 0.1151                 | 0.0585                 |
|                      | $d2^*$                | (Si; 3Sr1; 3Sr2) | 2.8169   | 0.8592     | 0.2817 | 0.7183 | 0.0639                 | 0.0759                 |
|                      | $d2^*$                | (Si; 3Sr1; 3Sr2) | 2.8399   | 0.8592     | 0.2817 | 0.7183 | 0.0641                 | 0.0758                 |
| Sr <sub>2</sub> Ge † | $d1^*$                | (Ge; 3Sr1; 2Sr2) | 1.7518   | 0.8269     | 0.3463 | 0.6537 | 0.1127                 | 0.0586                 |
|                      | $d2^*$                | (Ge; 3Sr1; 3Sr2) | 2.9505   | 0.8630     | 0.2741 | 0.7259 | 0.0620                 | 0.0741                 |
|                      | $d2^*$                | (Ge; 3Sr1; 3Sr2) | 2.9750   | 0.8629     | 0.2742 | 0.7258 | 0.0621                 | 0.0740                 |
| Ba <sub>2</sub> Si † | $d1^*$                | (Si; 3Ba1; 2Ba2) | 1.6680   | 0.8187     | 0.3626 | 0.6374 | 0.1197                 | 0.0616                 |
|                      | $d2^*$                | (Si; 3Ba1; 2Ba2) | 1.8189   | 0.8555     | 0.2891 | 0.7109 | 0.0775                 | 0.0670                 |
|                      | $d2^*$                | (Si; 3Ba1; 2Ba2) | 1.8302   | 0.8553     | 0.2894 | 0.7106 | 0.0775                 | 0.0671                 |
|                      | $d3^*$                | (Si; 4Ba1; 3Ba2) | 1.9944   | 0.8540     | 0.2919 | 0.7081 | 0.0421                 | 0.1028                 |
| Ba <sub>2</sub> Ge † | $d1^*$                | (Ge; 3Ba1; 2Ba2) | 1.6680   | 0.8187     | 0.3626 | 0.6374 | 0.1197                 | 0.0616                 |
|                      | $d2^*$                | (Ge; 3Ba1; 2Ba2) | 1.8189   | 0.8555     | 0.2891 | 0.7109 | 0.0775                 | 0.0670                 |
|                      | $d2^*$                | (Ge; 3Ba1; 2Ba2) | 1.8302   | 0.8553     | 0.2894 | 0.7106 | 0.0775                 | 0.0671                 |
|                      | $d3^*$                | (Ge; 4Ba1; 3Ba2) | 1.9944   | 0.8540     | 0.2919 | 0.7081 | 0.0421                 | 0.1028                 |
| Ba <sub>2</sub> Pb † | $d1^*$                | (Pb; 3Ba1; 2Ba2) | 1.6398   | 0.8012     | 0.3976 | 0.6024 | 0.1261                 | 0.0722                 |
|                      | $d2^*$                | (Pb; 3Ba1; 2Ba2) | 1.9147   | 0.8443     | 0.3115 | 0.6885 | 0.0801                 | 0.0755                 |
|                      | $d2^*$                | (Pb; 3Ba1; 2Ba2) | 1.9240   | 0.8440     | 0.3121 | 0.6879 | 0.0803                 | 0.0757                 |
|                      | $d3^*$                | (Pb; 4Ba1; 3Ba2) | 1.8431   | 0.8540     | 0.2920 | 0.7080 | 0.0463                 | 0.0978                 |

† TiNiSi-type (optimized)

**Table S9c.** Data referred to ELI-D valence basins for binary phases with the *cF12*-CaF<sub>2</sub> structure **without PSC0**.

| <i>Compound</i>                   | <i>Atomicity</i> | $\bar{N}(B_i)$ | $p(B_i^E)$ | <i>cc</i> | <i>lpc</i> | $\sum_l p(B_i^{A1l})$ |
|-----------------------------------|------------------|----------------|------------|-----------|------------|-----------------------|
| Be <sub>2</sub> C ††              | (C; Be)          | 0.9708         | 0.9190     | 0.1619    | 0.8381     | 0.0797                |
|                                   | (C; Be)          | 0.9710         | 0.9189     | 0.1623    | 0.8377     | 0.0797                |
|                                   | (C; Be)          | 0.9712         | 0.9197     | 0.1606    | 0.8394     | 0.0798                |
|                                   | (C; Be)          | 0.9711         | 0.9193     | 0.1615    | 0.8385     | 0.0798                |
|                                   | (C; Be)          | 0.9715         | 0.9190     | 0.1620    | 0.8380     | 0.0801                |
|                                   | (C; Be)          | 0.9716         | 0.9197     | 0.1606    | 0.8394     | 0.0801                |
|                                   | (C; Be)          | 0.9722         | 0.9194     | 0.1613    | 0.8387     | 0.0801                |
|                                   | (C; Be)          | 0.9738         | 0.9185     | 0.1631    | 0.8369     | 0.0810                |
| Mg <sub>2</sub> C ††              | (C; Mg)          | 0.9709         | 0.8957     | 0.2087    | 0.7913     | 0.1037                |
|                                   | (C; Mg)          | 0.9709         | 0.8957     | 0.2087    | 0.7913     | 0.1037                |
|                                   | (C; Mg)          | 0.9709         | 0.8957     | 0.2089    | 0.7911     | 0.1038                |
|                                   | (C; Mg)          | 0.9709         | 0.8960     | 0.2081    | 0.7919     | 0.1037                |
|                                   | (C; Mg)          | 0.9710         | 0.8956     | 0.2089    | 0.7911     | 0.1037                |
|                                   | (C; Mg)          | 0.9709         | 0.8960     | 0.2080    | 0.7920     | 0.1038                |
|                                   | (C; Mg)          | 0.9718         | 0.8955     | 0.2091    | 0.7909     | 0.1043                |
|                                   | (C; Mg)          | 0.9718         | 0.8953     | 0.2095    | 0.7905     | 0.1043                |
| Mg <sub>2</sub> Sn ††             | (Sn; Mg)         | 1.0130         | 0.8636     | 0.2729    | 0.7271     | 0.1364                |
|                                   | (Sn; Mg)         | 1.0134         | 0.8634     | 0.2731    | 0.7269     | 0.1366                |
|                                   | (Sn; Mg)         | 1.0132         | 0.8636     | 0.2728    | 0.7272     | 0.1364                |
|                                   | (Sn; Mg)         | 1.0134         | 0.8633     | 0.2733    | 0.7267     | 0.1367                |
|                                   | (Sn; Mg)         | 1.0133         | 0.8634     | 0.2732    | 0.7268     | 0.1366                |
|                                   | (Sn; Mg)         | 1.0134         | 0.8634     | 0.2731    | 0.7269     | 0.1366                |
|                                   | (Sn; Mg)         | 1.0135         | 0.8633     | 0.2733    | 0.7267     | 0.1367                |
|                                   | (Sn; Mg)         | 1.0135         | 0.8633     | 0.2733    | 0.7267     | 0.1367                |
| <i>hyp</i> -Ba <sub>2</sub> Ge †† | (Ge; 4Ba)        | 1.2171         | 0.8535     | 0.2930    | 0.7070     | 0.1465                |
|                                   | (Ge; 4Ba)        | 1.2260         | 0.8546     | 0.2909    | 0.7091     | 0.1454                |
|                                   | (Ge; 4Ba)        | 1.2262         | 0.8544     | 0.2911    | 0.7089     | 0.1456                |
|                                   | (Ge; 4Ba)        | 1.2178         | 0.8532     | 0.2936    | 0.7064     | 0.1468                |
|                                   | (Ge; 4Ba)        | 1.2352         | 0.8545     | 0.2910    | 0.7090     | 0.1455                |
|                                   | (Ge; 4Ba)        | 1.2352         | 0.8545     | 0.2910    | 0.7090     | 0.1455                |

†† anti-CaF<sub>2</sub>-type (optimized)

<sup>1</sup> N.N. Matyushenko, A.A. Rozen, N.S. Pugachev, *Sov. Powder Metall. Met. Ceram.*, 1966, **5**,

---

310–312.

- <sup>2</sup> O. O. Kurakevych, T. A. Strobel, D. Y. Kim, G.D. Cody, *Angew. Chem. Int. Ed.*, 2013, **52**, 8930–8933.
- <sup>3</sup> H. Kasai, L. Song, H. L. Andersen, H. Yin, B. B. Iverrsen, *Acta Crystallogr. B*, 2017, **73**, 1158–1163.
- <sup>4</sup> H. Wu, W. Zhou, T. J. Udovic, J.J. Rush, *Chem. Mater.*, 2007, **19**, 329–334.
- <sup>5</sup> P. Eckerlin, E.R. Wölfel, *Z. Anorg. Allg. Chem.*, 1955, **280**, 321–331.
- <sup>6</sup> A. Widera, B. Eisenmann, H. Schäfer, *Z. Naturforsch. B*, 1976, **31**, 520–521.
- <sup>7</sup> B. Eisenmann, H. Schäfer, K. Turban, *Z. Naturforsch. B*, 1975, **30**, 677–680.
- <sup>8</sup> A. Widera, H. Schäfer, *Z. Naturforsch. B*, 1976, **31**, 1434–1435.
- <sup>9</sup> K. Turban, H. Schäfer, *Z. Naturforsch.*, 1973, **28**, 220–222.
- <sup>10</sup> K. Guttsche, A. Rosin, M. Wendorff, C. Röhr, *Z. Naturforsch. B*, 2006, **61**, 846–853.
- <sup>11</sup> N. Miyazaki, N. Adachi, Y. Todaka, H. Miyazaki, Y. Nishino, *J. Alloys Compd.*, 2017, **691**, 914–918.
- <sup>12</sup> B. Eisenmann, H. Schäfer, A. Weiss, *Z. Anorg. Allg. Chem.*, 1972, **391**, 241–254.
- <sup>13</sup> M. C. Schäfer, N.-T. Suen, S. Bobev, *Dalton Trans.*, 2014, **43**, 16889–16901.
- <sup>14</sup> X.-J. Feng, Yu. Prots, M. P. Schmidt, S. Hoffmann, I. Veremchuk, W. Schnelle, U. Burkhardt, J.-T. Zhao, Yu. Grin, *Inorg. Chem.*, 2013, **52**, 8971–8978.
- <sup>15</sup> W. Bronger, C. Bomba, H. Sabrowsky, *J. Less Common Met.*, 1989, **156**, 43–47.
- <sup>16</sup> K. Hippler, P. Vogt, R. Wortmann, H. Sabrowsky, *Z. Naturforsch. B*, 1989, **44**, 1607–1609.
